# Supplementary material
Source: MDPI journal article supplement (https://www.mdpi.com/2076-3417/11/24/12166)
Supplement: s1 [file s1]

**Estimation of the tapered Gutenberg-Richter distribution parameters  
for catalogs with variable completeness: an application to the Atlantic  
ridge seismicity**

Matteo Taroni, Jacopo Selva, Jiancang Zhuang

**Supplementary Material**

In this Supplementary Material, we show two figures, S1 and S2, that represent the estimation of the tapered Gutenberg-Richter parameters using the completeness thresholds of 5.6 (from 1980) and 5.1 (from 2004) for S1, and 5.7 (from 1980) and 5.2 (from 2004) for S2.

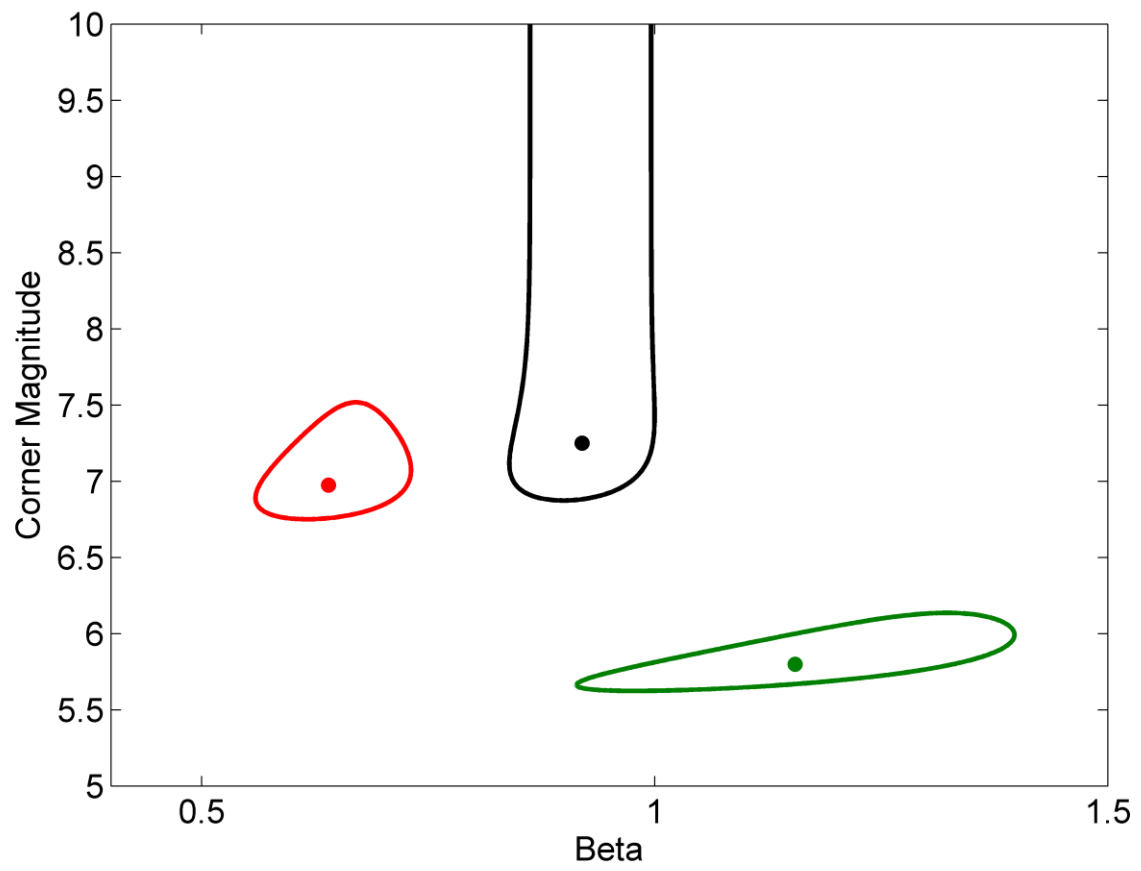

**Figure S1:** 95% confidence region estimation (curves) and MLE (dots) for the whole catalog (black), strike-slip events (red), and normal events (green) (completeness thresholds +0.1).

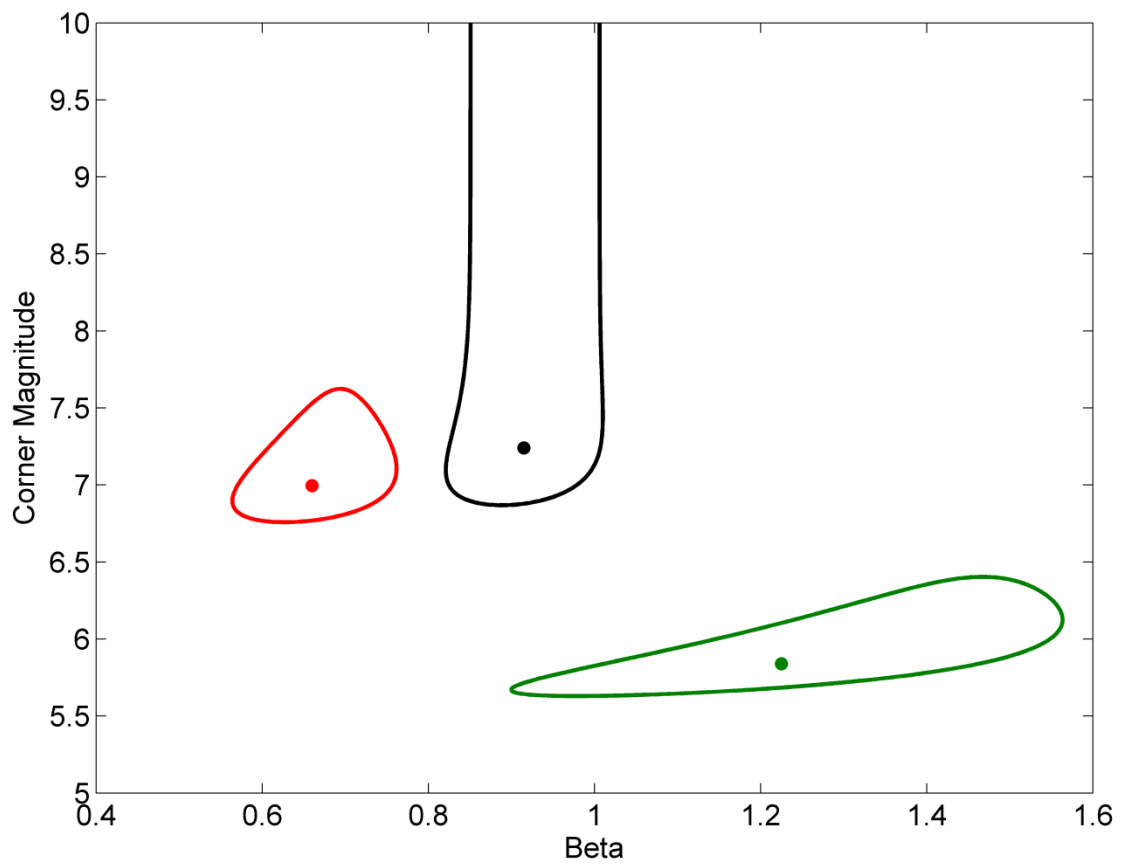

**Figure S2:** 95% confidence region estimation (curves) and MLE (dots) for the whole catalog (black), strike-slip events (red), and normal events (green) (completeness thresholds +0.2).
